# Supplementary material
Source: PubMed Central journal article supplement (PMC4396267)
Supplement: ijcep0008-1259-f7.pdf [file ijcep0008-1259-f7.pdf]

## BTLA associates with Foxp3 expression in DSS-induced colitis

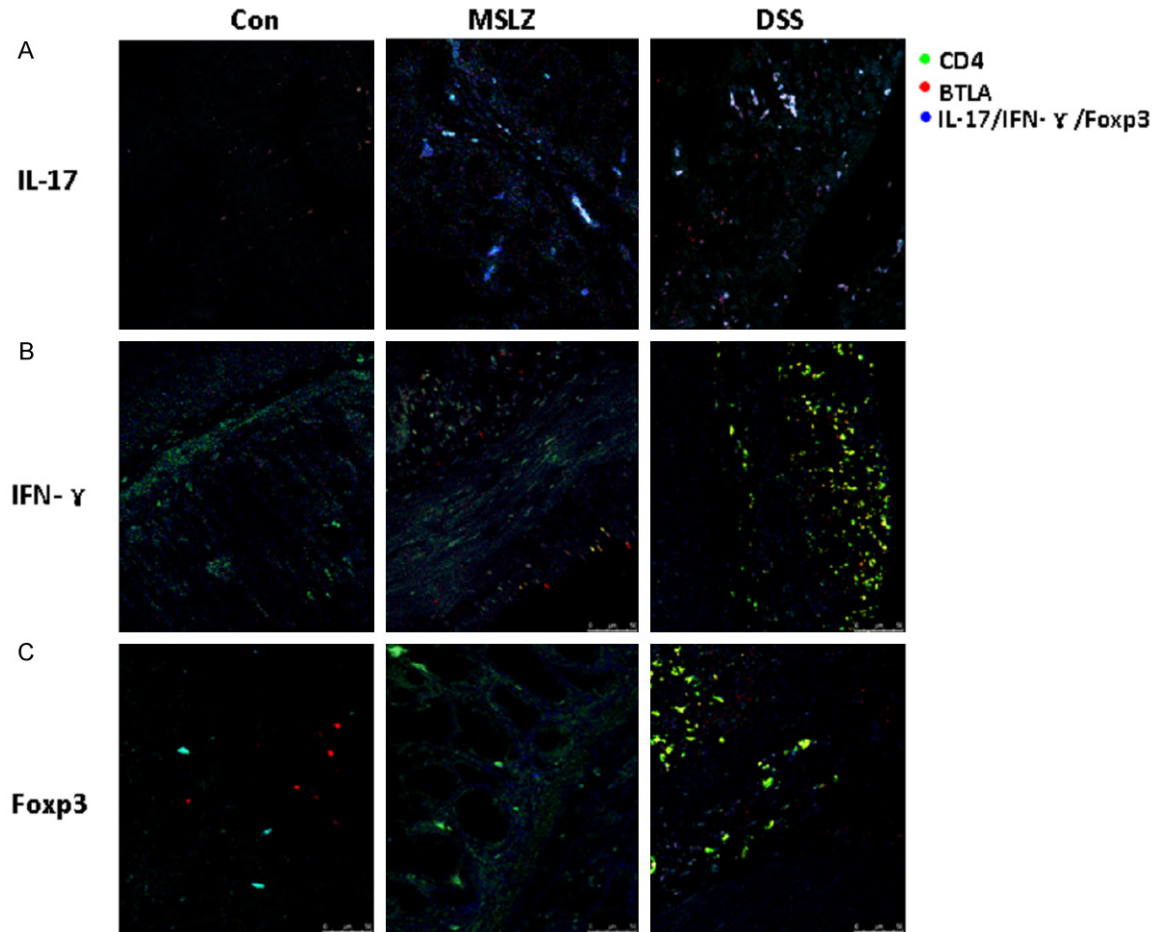

**Figure S1.** Foxp3, IL-17 and IFN- $\gamma$  expression in BTLA<sup>+</sup> T cells in colon tissue from DSS-induced colitis. To determine co-expression of BTLA with IL-17, IFN- $\gamma$  and Foxp3 in colon tissues from DSS-induced colitis, paraffin sections were stained with fluorescent labeled anti-mouse CD4, anti-mouse BTLA, and anti-mouse IL-17 (A), anti-mouse IFN- $\gamma$  (B) or anti-mouse Foxp3 (C).
